# Supplementary material for: Hemodynamic effects of low versus high dialysate temperature in hemodialysis patients: a single-blinded, randomised, cross-over study
Source: Research Square preprint supplement (doi:10.21203/rs.3.rs-7251357/v1), 2025-08-21
Supplement: Supplementary file 1 [file 66b3c1b514acbc7d4a5c32ac.docx]

## Supplementary material

**Blood samples and arterial blood gases**
All blood samples were drawn from the arterial cannula. The first sample was drawn just before start of the dialysis session (preHD) and analyzed for urea, hemoglobin, white cell count, C-reactive protein (CRP) and magnesium (Mg2+). The last sample was drawn just before disconnecting from the console (postHD) and analyzed for urea and Mg2+. These samples were analyzed according to clinical standards. During dialysis additional samples were scheduled as the Transonic measurements and included blood gases (O2, CO2), ions (Na+, K+, non-pH corrected Ca2+, and HCO3-), and pH using the ABL90 FLEX PLUS blood gas analyzer (Radiometer Medical ApS, Brønshøj, Denmark). Blood gases, ions, and pH were also obtained just before the start of dialysis (preHD) and just before disconnecting from the console (postHD).

**Bioimpedance measurements**

Twenty minutes before dialysis, fluid status was determined using whole body bioimpedance spectroscopy with a Body Composition Monitor (BCM, Fresenius Medical Care) with participants placed in the supine position. Using four electrodes placed at the hand, wrist, foot, and ankle on the non-AV-fistula side of the body and a built-in algorithm based on gender, age, height, and preHD weight, BCM measures at 50 frequencies over a range from 5 to 1000 kHz to determine the total body water (TBW), the extracellular water (ECW) and the intracellular water (ICW).

**Study population**

Inclusion criteria: HD or HDF therapy for > 3 months, age >18 years, a stable and functional AV fistula, capable of a cumulative ultrafiltration volume of >2% of end-dialytic weight, hematocrit > 30%, BMI between 18-35, and able to achieve a dialysis blood flow > 250 mL, stand up for >10 minutes, undergo a 4-hour dialysis session without eating, drinking or sleeping and to give informed consent.

Exclusion criteria: central venous catheter as access, recirculation in the AV-fistula, acute myocardial infarction and/or cerebrovascular events within 3 months, atrial fibrillation, active malignant or infectious diseases, pregnancy, alcohol or drug abuse and history of interruptions during dialysis sessions and termination of dialysis before the scheduled time.

**Intradialytic hemodynamic parameters**

Cardiac output was measured in duplicate by injection of 30 ml of isotonic saline (37ºC) into the venous blood line within 5 seconds. If results deviated more than 15%, a third measurement was made. The mean of the two closest recordings were noted as the result. To rule out AV-fistula recirculation, a built-in recirculation protocol was performed prior to the first measurement. Based on CO, Transonic estimates the blood volume in the heart, lungs and great vessels known as the central blood volume (CBV). The systolic BP, diastolic BP and the heart rate (HR) was measured just before each CO measurement enabling calculation of the mean arterial pressure (MAP), total peripheral resistance (TPR) and stroke volume (SV) using the following equations:

**Sample size and power calculation**The primary endpoint was the change in systolic BP from preHD to postHD. Details regarding assumptions behind our power calculation are given in our protocol (available at ClinicalTrials.gov [NCT05052151](https://clinicaltrials.gov/study/NCT05052151?locStr=Aarhus,%20Denmark&country=Denmark&city=Aarhus&cond=Dialysis&rank=3#study-record-dates)). Sample size calculation with Stata/IC 16.1 (StataCorp LP, TX, USA) using analysis for a one-sample mean test (t-test), assuming a minimal detectable difference in means (mean difference between the two within-treatment changes in systolic BP) = 10 mmHg; standard deviation (SD) = 12 mmHg; two-sided significance level α = 0.05; power = 0.80 resulted in 14 participants. To account for dropout of two participants, a sample size of 16 was chosen.

**Statistical analyses**

Within treatment changes (Δ values during LDT or HDT) and between intervention changes (ΔLDT vs. ΔHDT, ΔΔ values) were calculated. Interventions were compared with a null hypothesis of no difference between the two interventions (ΔΔ -value of zero). The results were analysed with a paired Student´s t-test, χ2-test (frequency of orthostatic hypotension and intradialytic symptoms) and logistic regression (intradialytic symptoms dichotomized to 0 or ≥1). The assumption of normality was checked with histograms and QQ-plots. To compare the development over time with LDT and HDT (between treatment comparison), selected variables were analyzed with a linear mixed-effects model with sequence, treatment, and time, along with the interaction between the latter two as fixed effects. Patient and day of intervention were included as random effects. Model validation was performed by plotting the standardized residuals against the fitted values and making a QQ-plot of the standardized residuals. Selected intradialytic parameters were also analyzed with mixed analysis based on summary statistics (mean or minimum based on all intradialytic measurements). A two-tailed significance level of 0.05 was chosen. Data were analyzed using Stata/IC version 17.0.

**Heart rate**

Heart rate tended to increase during dialysis with HDT with a mean increase of 6(-2;15) beats/min between preHD and 230 minutes whereas dialysis with LDT showed little change in heart rate from preHD to 230 minutes with a mean difference of 0(-6;6) beats/min (Figure 3B, Table 3 and Supplement). The intradialytic heart rate response was significantly different between preHD and 230 minutes with a mean between intervention difference of -6.6(-13.0;-0.2) beats/min; *P*=0.04.

Comparison of preHD vs. postHD heart rate showed a significant between intervention mean difference of -5.2(-10.6;-0.02) beats/min; *P*<0.05. Mixed model analysis did not find a significant difference in the heart rate response over time from preHD to 230 minutes (*P*=0.22) and from preHD to postHD (*P*=0.29) when LDT was compared with HDT, but if all intradialytic measurements were averaged mean intradialytic heart rate was 5(1;9) beats/min; *P*=0.008 higher with HDT compared to HDT in mixed model summary statistics analysis.

**Intradialytic symptoms**

Patients tended to report more intradialytic symptoms during dialysis with HDT. Logistic regression (intradialytic symptoms 0 or ≥1) had odds ratio (HDT vs. LDT): 2.8(0.5-14.4); *P*=0.22. Six patients had one or more intradialytic symptoms during HDT vs. three patients during LDT, *P*=0.23. The total number of events were n=8 with HDT vs. n=4 with LDT. Three patients experienced a feeling of warmth during HDT vs. one during LDT, and three patients had intradialytic hypotensive symptoms requiring temporary ultrafiltration stop during HDT vs. one during LDT. The frequency of leg cramps was similar (HDT: n=2 vs. LDT: n=2). No patients reported they felt cold or shivered on LDT.

**Table A: Orthostatic blood pressure response**

|  | **LDT** (n=14) | **HDT** (n=13) | **LDT vs. HDT** |
| --- | --- | --- | --- |
| **PreHD** | | | |
| Mean change in systolic BP (mmHg) | -11±15 | -9±17 | -2 [-9;5]; *P*=0.52 |
| Orthostatic hypotension n (%) | 3 (21%) | 1 (7%) | *P*=0.28 |
| **PostHD** | | | |
| Mean change in systolic BP (mmHg) | -22±19 | -20±17 | -2 [-9;5]; *P*=0.52 |
| Orthostatic hypotension, n (%) | 6 (43%) | 7(54%) | *P*=0.57 |
| **Pre vs. postHD** | | | |
| Difference in systolic BP (mmHg) | *11* [*4;19*]*; P=0.008* | *11* [6;15]; *P*=0.005 | -1[-9;7]; *P*=0.89 |
| Orthostatic hypotension, pre- vs. postHD | *P*=0.23 | *P*=0.01 |  |

PreHD measurements were performed approximately 20 minutes before start of HD with postHD measurements occurring approximately 10 minutes after ending dialysis. Results are presented as mean ±SD, mean difference with 95% confidence interval, number of patients with percentage (%) or p-values (comparison of number of patients). Chi2-test was used for comparison of the frequency of OH between interventions (LDT vs. HDT) and pre vs. postHD. Orthostatic hypotension was defined as a fall in systolic BP>20 mmHg or a fall in diastolic BP>10 mmHg within 3 minutes of standing. Regardless of intervention, no patients had a fall in diastolic BP >10 mmHg without also having a fall in systolic BP>20 mmHg. With HDT one participant did not complete postHD orthostatic BP measurement due to dizziness and technical issues with the BP device leaving 13 participants for analysis.

**Table B: Blood samples and arterial blood gasses with reference ranges**

|  | **LDT**  **(PreHD)**  Mean ± SD | **ΔLDT**  **(HDpost-HDpre)**  Mean (95% CI) | **HDT**  **(PreHD)**  Mean ± SD θ | **ΔHDT**  **(HDpost-HDpre)**  Mean (95% CI) | **ΔΔ (ΔLDT vs. ΔHDT)**  Mean (95% CI) θ |
| --- | --- | --- | --- | --- | --- |
| P-Mg2+  (mmol/l, 0.70-1.10) | 1.08 ± 0.18 | -0.11 (-0.18;-0.04)** | 1.09 ± 0.19 | -0.16 (-0.24;-0.08)** | 0.05 (-0.01;0.11) |
| P-Na+  (mmol/l, 137-145) | 137.1 ± 4.7 | -0.1 (-1.7;1.4) | 138.2 ± 3.7 | -0.3 (-1.8;1.2) | -0.1 (-1.6;1.5) |
| P-K+  (mmol/l, 3.5-4.6) | 4.75 ± 0.80 | -1.42 (-1.73;-1.11)** | 4.82 ± 0.67 | -1.41 (-1.69;-1.13)** | -0.02 (-0.21;0.18) |
| P-Ca2+ non-pH corrected  (mmol/l, 1.18-1.32) | 1.17 ± 0.07 | -0.05 (-0.09;-0.01)* | 1.16 ± 0.07 | -0.03 (-0.08;0.01) | -0.01 (-0.03;0.01) |
| P-HCO3  (mmol/l, 22-27) | 25.0 ± 1.7 | 4.7 (3.6;5.9)** | 25.5 ± 2.4 | 4.8 (3.6;6.0)** | -0.1 (-1.0:0.9) |

PreHD measurements were performed approximately 20 minutes before start of HD with postHD measurements occurring approximately 10 minutes after ending dialysis. Results are presented as mean ± SD or mean with 95% confidence interval (95% CI).

HD hemodialysis, LDT low dialysate temperature, HDT high dialysate temperature, P plasma, Mg2+ magnesium, Na+ sodium, K+ potassium, Ca2+ calcium, HCO3 bicarbonate

θ For blood samples and arterial blood gasses number of participant (n) varies (HDT (pre HD) n=13, ΔΔ (ΔLDT-ΔHDT) n=13) do to failed samples.

**P*< 0.05; ***P*<0.01
